# Supplementary material for: Anion response of organogels: dependence on intermolecular interactions between gelators
Source: Royal Society of Chemistry journal article supplement (doi:10.1039/c3ob27241a), 2013-01-01
Supplement: c3ob27241a.pdf [file c3ob27241a.pdf]

## **Anion Response of Organogels: Dependence on the Intermolecular Interaction between Gelators**

Pengchong Xue,<sup>\*a</sup> Jiabao Sun,<sup>a</sup> Qiuxia Xu,<sup>a</sup> Ran Lu,<sup>\*a</sup> Makoto Takafuji<sup>b</sup> and Hirotaka Ihara<sup>b</sup>

<sup>a</sup> State Key Laboratory of Supramolecular Structure and Materials, College of Chemistry, Jilin University, 2699# Changchun, China; E-mail: xuepengchong@jlu.edu.cn; luran@mail.jlu.edu.cn

<sup>b</sup> Department of Applied Chemistry and Biochemistry, Kumamoto University, 2-39-1 Kurokami, Kumamoto, Japan

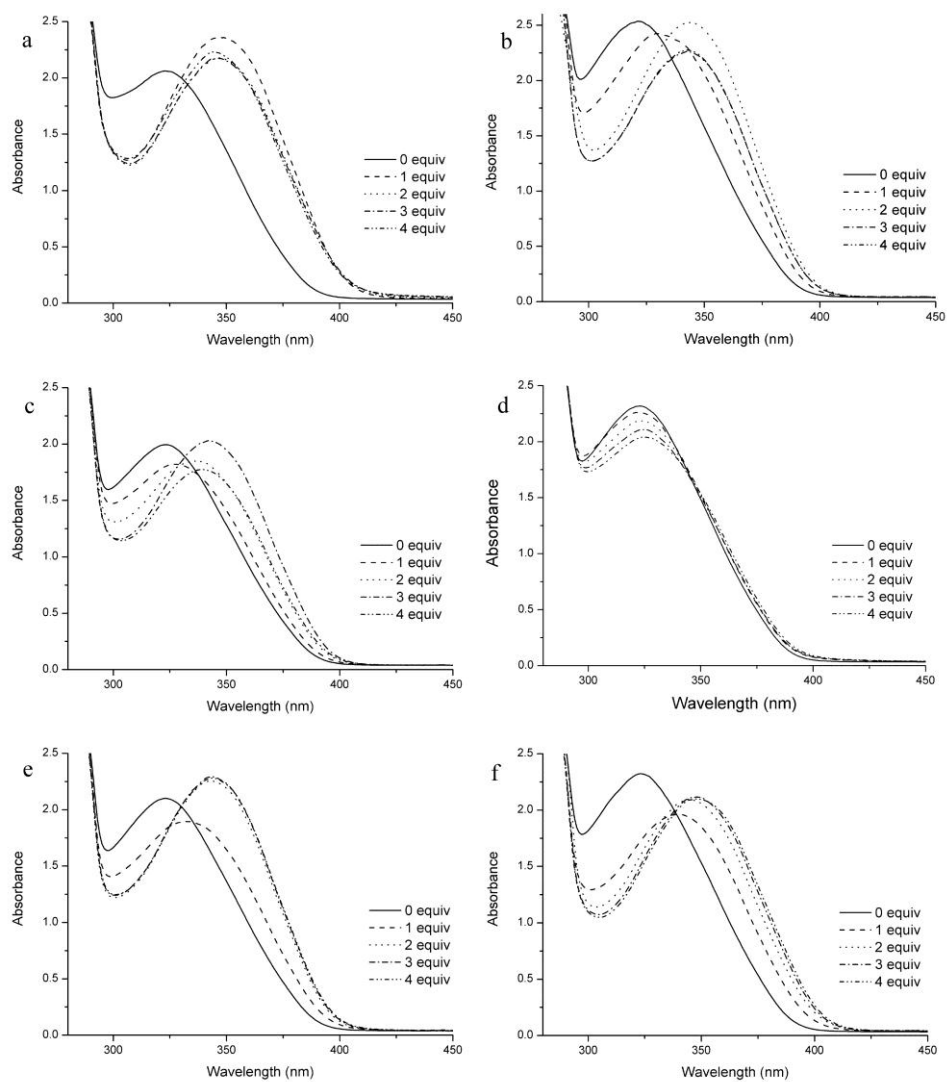

**Fig. S1** The absorption spectra of **1** in *o*-dichlorobenzene (1.1 mM) upon the addition of (a)  $F^-$ , (b)  $Cl^-$ , (c)  $Br^-$ , (d)  $I^-$ , (e)  $AcO^-$ , and (f)  $H_2PO_4^-$ .

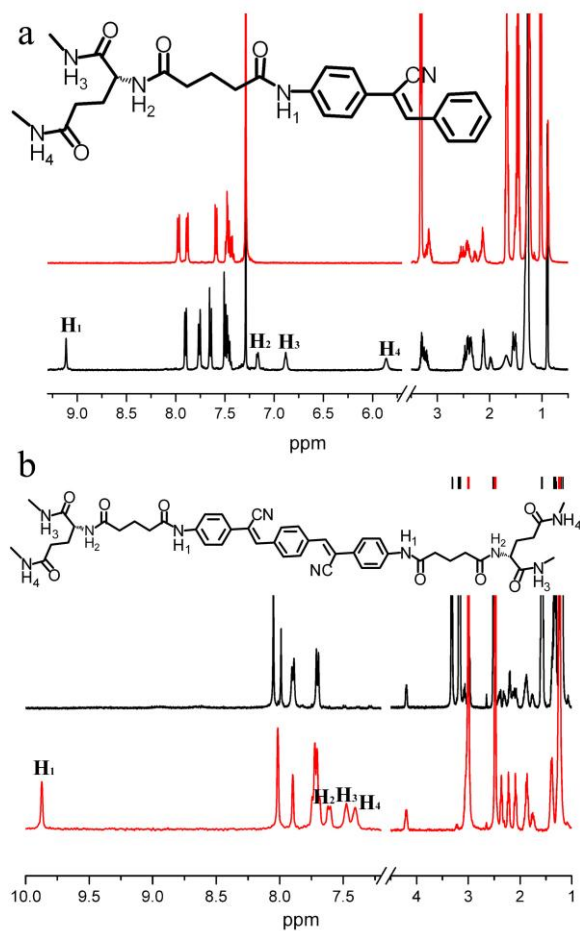

**Fig. S2**  $^1\text{H}$  NMR spectra of **1** (a) in  $\text{CDCl}_3$  (4.2 mM) and **2** in  $d_6$ -DMSO (2.1 mM) before and after adding 4 equiv of TBAF.

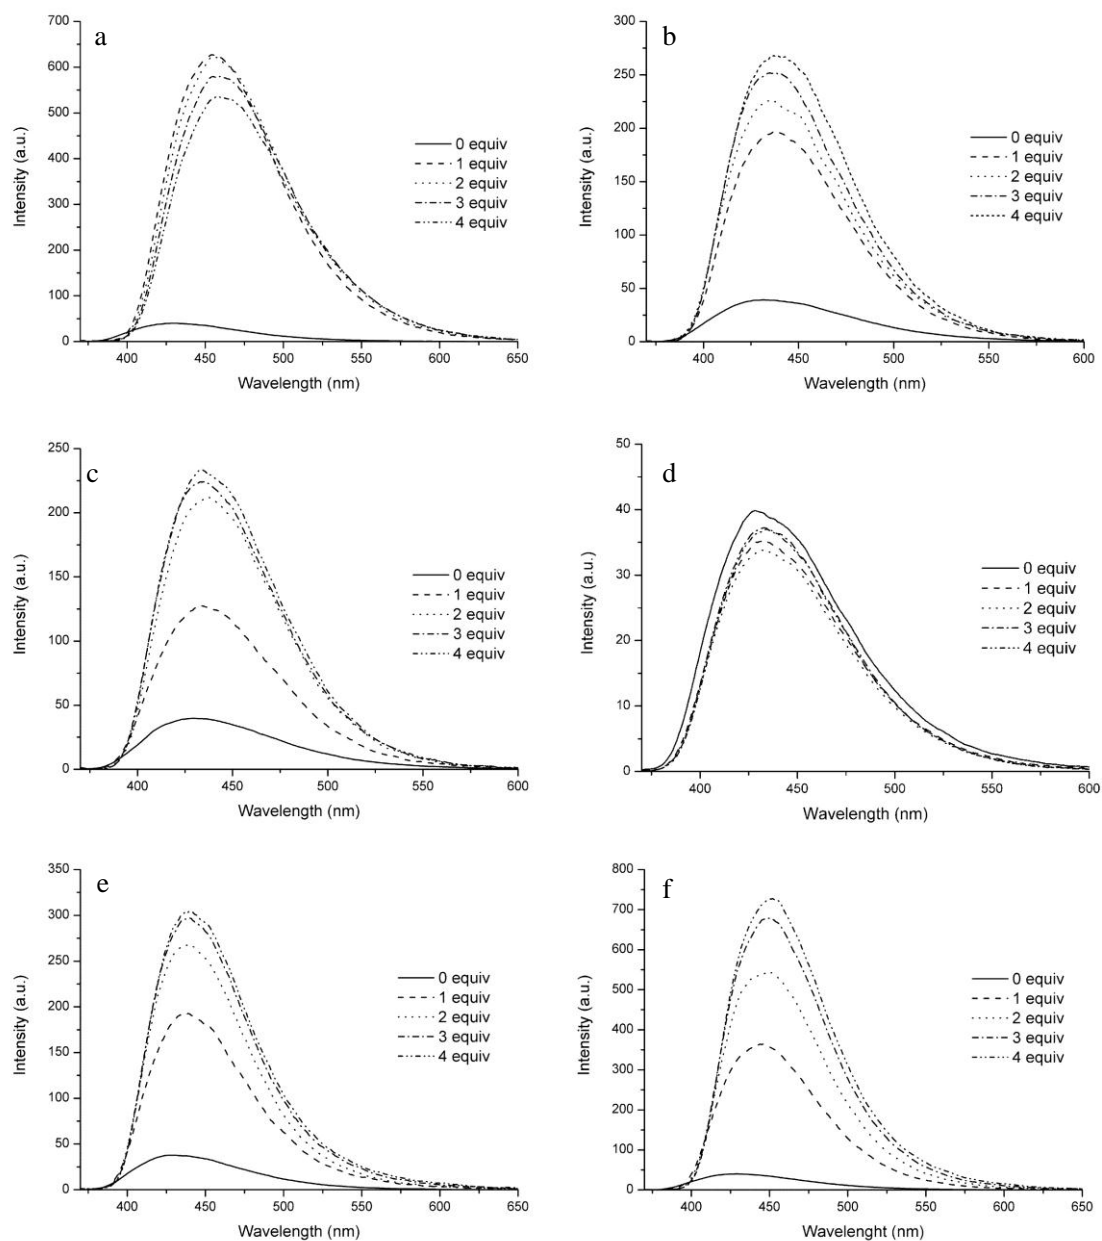

**Fig. S3** The fluorescence spectral changes of **1** in *o*-dichlorobenzene (1.1 mM) upon the addition of (a) F<sup>-</sup>, (b) Cl<sup>-</sup>, (c) Br<sup>-</sup>, (d) I<sup>-</sup>, (e) AcO<sup>-</sup>, and (f) H<sub>2</sub>PO<sub>4</sub><sup>-</sup>.

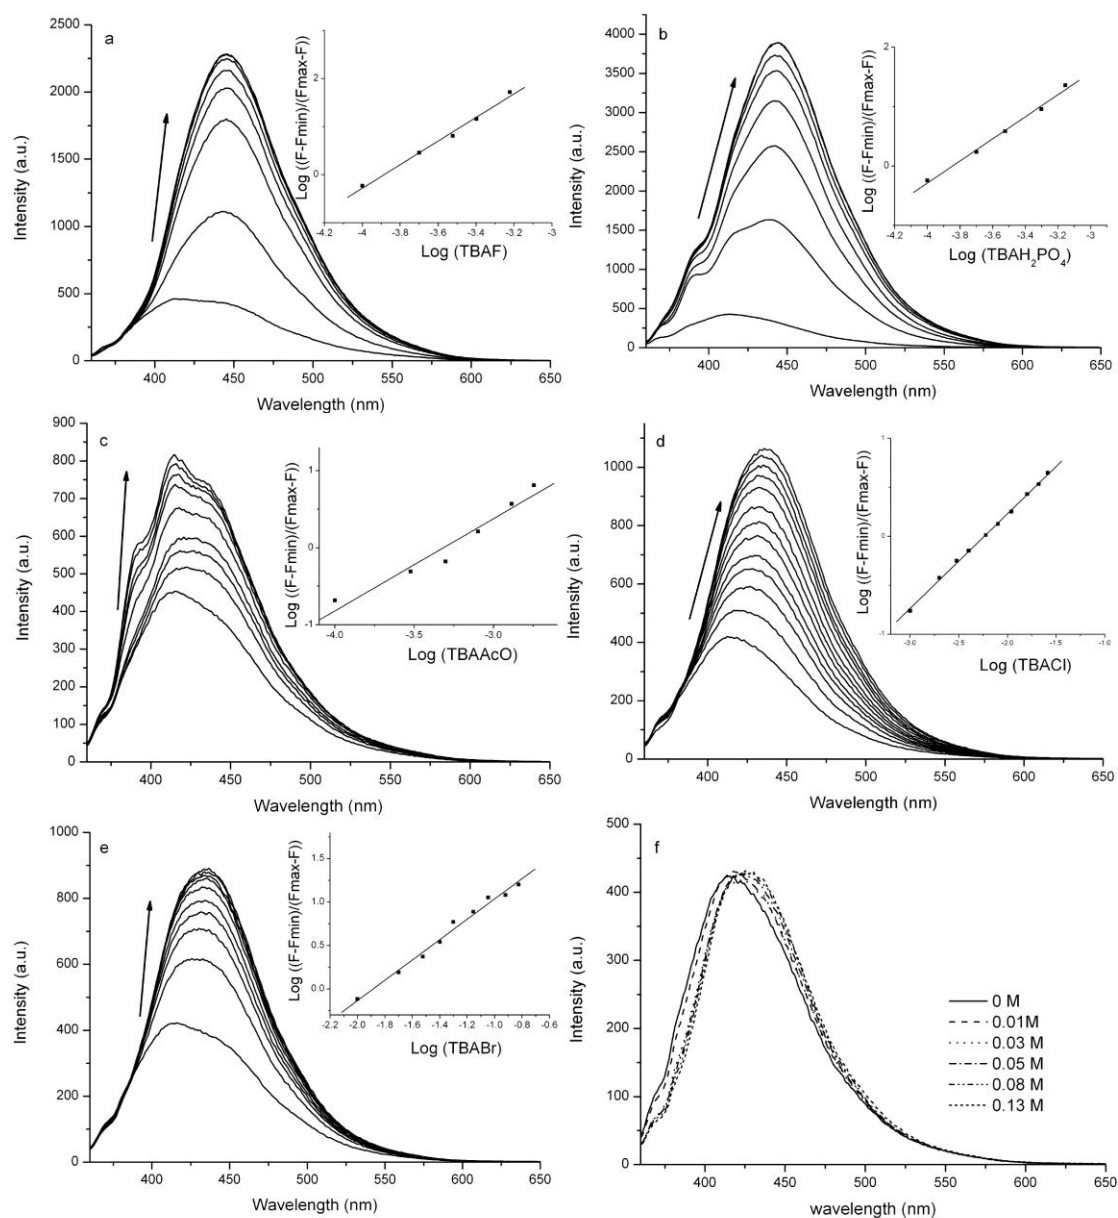

**Fig. S4** Fluorescent spectral changes of **1** (10  $\mu\text{M}$ ) in  $\text{CHCl}_3$  upon the addition of (a)  $\text{F}^-$ , (b)  $\text{H}_2\text{PO}_4^-$ , (c)  $\text{AcO}^-$ , (d)  $\text{Cl}^-$ , (e)  $\text{Br}^-$ , and (f)  $\text{I}^-$  at 20  $^\circ\text{C}$ . Excitation wavelength was 340 nm. The insets show a plot of  $\log((F-F_{\min})/(F_{\max}-F))$  at 420 nm vs.  $\log(\text{anions})$ .

The binding constant of **1** to different anions can be obtained by following equation.

$$\log \frac{F - F_{\min}}{F_{\max} - F} = n \log[G] + B$$

$F_{\min}$ ,  $F_{\max}$  and  $F$  are the emission intensities of the solution at wavelength 420 nm in the absence of anions, the presence of a large excess of anions, and after the addition of a given amount of anions to certain concentration, respectively.  $[G]$  is the concentration of anions,  $n$  is the number of anions bound per **1**,  $B$  is the binding constant ( $\log(K_{\text{ass}})$ ).

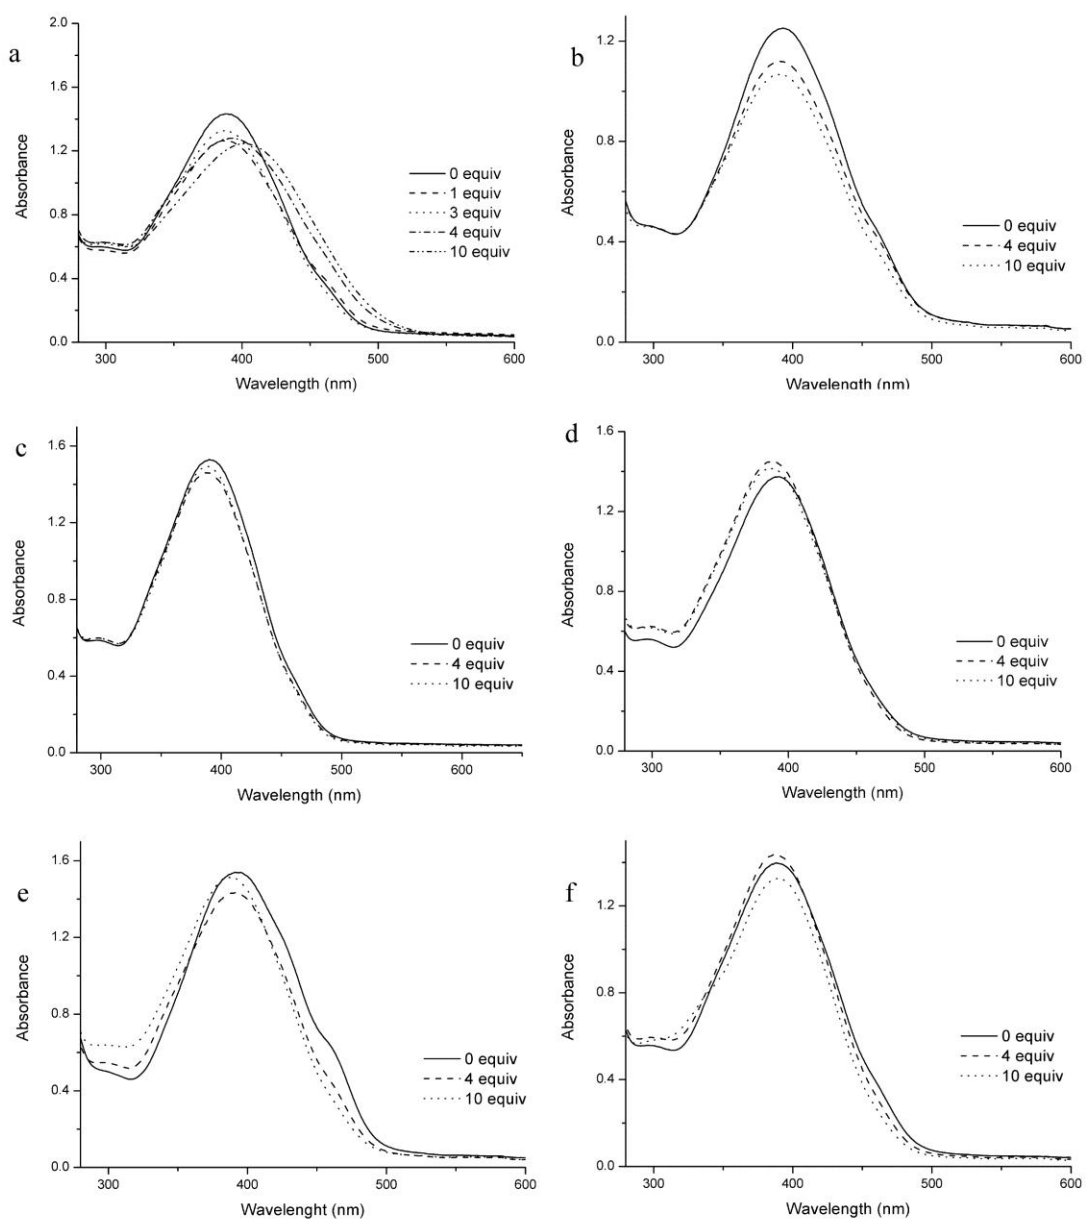

**Fig. S5** The absorption spectra of **2** (0.33 mM) in DMSO upon addition of (a)  $F^-$ , (b)  $Cl^-$ , (c)  $Br^-$ , (d)  $I^-$ , (e)  $AcO^-$ , and (f)  $H_2PO_4^-$ .

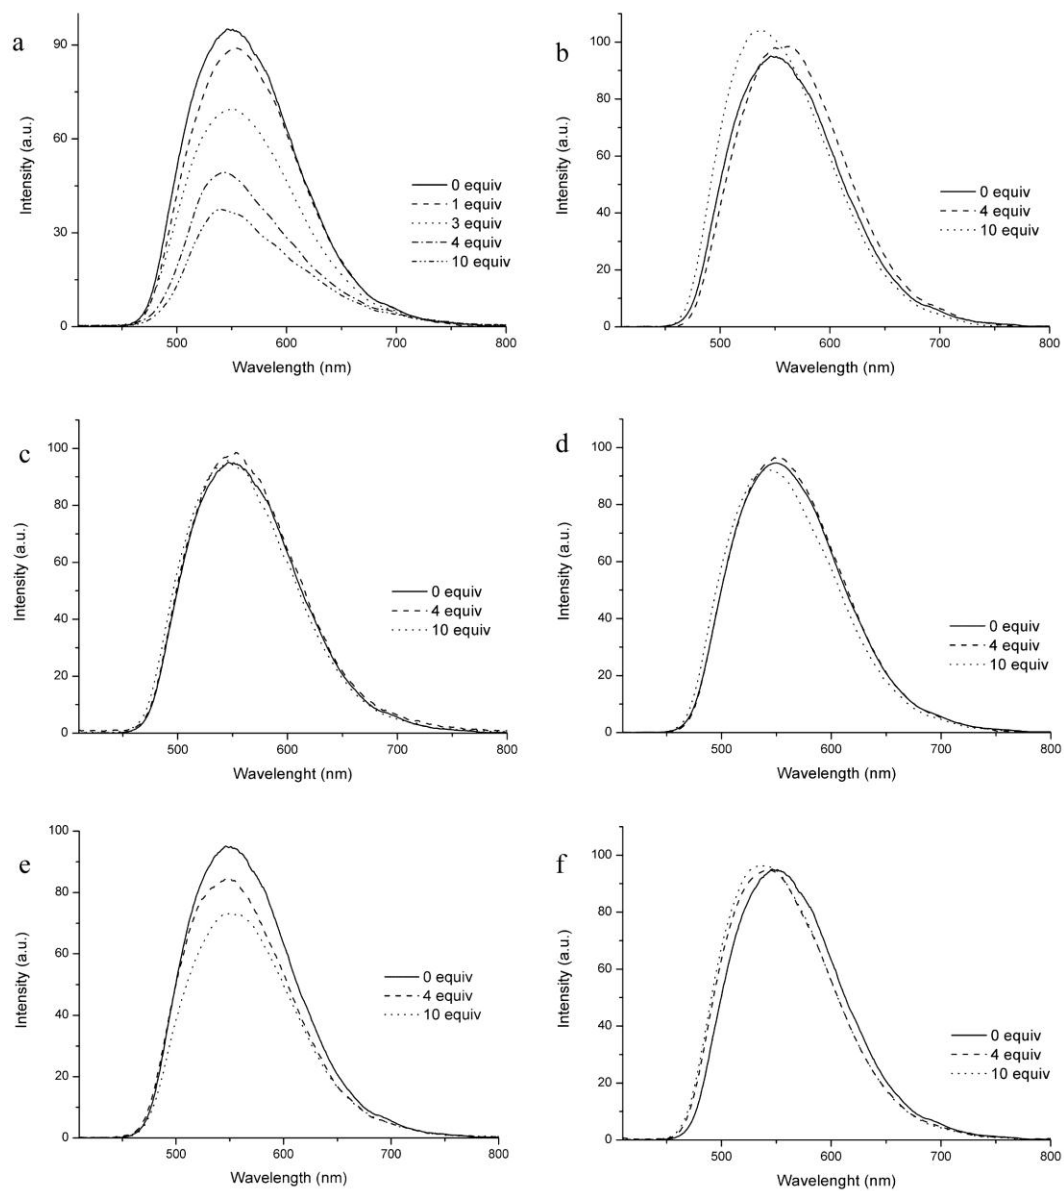

**Fig. S6** The fluorescence spectra of **2** in DMSO (0.33 mM) upon the addition of (a)  $F^-$ , (b)  $Cl^-$ , (c)  $Br^-$ , (d)  $I^-$ , (e)  $AcO^-$ , and (f)  $H_2PO_4^-$ .
